# Supplementary material for: Charging and ultralong phosphorescence of lanthanide facilitated organic complex
Source: PubMed Central journal article supplement (PMC8586359; doi:10.1038/s41467-021-26927-z), 2021-11-11
Supplement: 41467_2021_26927_MOESM3_ESM.pdf [file 41467_2021_26927_MOESM3_ESM.pdf]

## Description of Additional Supplementary Files

**Supplementary Movie 1:** Upon irradiation at 77K, 10  $\mu\text{M}$  **LaL1(TTA)<sub>3</sub>** in toluene shows a bright green afterglow which was observable up to 30 s by the naked eye under 355 nm laser excitation.

**Supplementary Movie 2:** Under the same conditions, the afterglow of **L1** is observed above 5 s.

**Supplementary Movie 3:** Long-lived phosphorescence can also be seen under white light excitation for **LaL1(TTA)<sub>3</sub>** at 100  $\mu\text{M}$  concentration.

**Supplementary Movie 4:** The vessel shows blue emission from all squares at room temperature.

**Supplementary Movie 5:** However, the desirable logo can be captured after excitation with a UV lamp under the cryogenic state.
